# Supplementary material
Source: publisher figshare collection journal article supplement (https://diabetesjournals.figshare.com/articles/dataset/_/17701001)
Supplement: Supplementary file 1 [file 1]

**Finerenone in Patients With Chronic Kidney Disease and  
Type 2 Diabetes According to Baseline HbA<sub>1c</sub>: An Analysis**

**From the FIDELIO-DKD Study**

**Online-Only Supplemental Material**

**Supplementary Table 1—Patients initiating insulin or insulin analogs during the study**

| <b>Baseline</b>         | <b>Initiated insulin postbaseline*</b> | <b>Finerenone<br/>(<i>n</i> = 2,833)</b> | <b>Placebo<br/>(<i>n</i> = 2,841)</b> | <b>Total<br/>(<i>N</i> = 5,674)</b> |
|-------------------------|----------------------------------------|------------------------------------------|---------------------------------------|-------------------------------------|
| Yes ( <i>n</i> = 3,637) | Yes                                    | 0                                        | 0                                     | 0                                   |
|                         | No                                     | 1,843 (65.1)                             | 1,794 (63.1)                          | 3,637 (64.1)                        |
| No ( <i>n</i> = 2,037)  | Yes                                    | 209 (7.4)                                | 260 (9.2)                             | 469 (8.3)                           |
|                         | No                                     | 781 (27.6)                               | 787 (27.7)                            | 1,568 (27.6)                        |

Data are presented as n (%).

\*At any time during the trial.

**Supplementary Table 2—Overall safety and treatment-emergent hyperkalemia-related events in patients according to baseline insulin use**

| <i>n</i> (%)                                                               | Baseline insulin use            |                                |                                   |                                |
|----------------------------------------------------------------------------|---------------------------------|--------------------------------|-----------------------------------|--------------------------------|
|                                                                            | Without insulin use             |                                | With insulin use                  |                                |
|                                                                            | Finerenone<br>( <i>n</i> = 989) | Placebo<br>( <i>n</i> = 1,041) | Finerenone<br>( <i>n</i> = 1,838) | Placebo<br>( <i>n</i> = 1,790) |
| Any investigator-reported AE                                               | 854 (86.3)                      | 903 (86.7)                     | 1,614 (87.8)                      | 1,575 (88.0)                   |
| Related to study drug                                                      | 205 (20.7)                      | 148 (14.2)                     | 441 (24.0)                        | 301 (16.8)                     |
| Leading to discontinuation                                                 | 76 (7.7)                        | 69 (6.6)                       | 131 (7.1)                         | 99 (5.5)                       |
| Any SAE                                                                    | 282 (28.5)                      | 318 (30.5)                     | 620 (33.7)                        | 653 (36.5)                     |
| Related to study drug                                                      | 12 (1.2)                        | 11 (1.1)                       | 36 (2.0)                          | 23 (1.3)                       |
| Leading to discontinuation                                                 | 26 (2.6)                        | 33 (3.2)                       | 49 (2.7)                          | 45 (2.5)                       |
| AE with outcome death                                                      | 7 (0.7)                         | 15 (1.4)                       | 24 (1.3)                          | 36 (2.0)                       |
| <b>Investigator-reported hyperkalemia-related AEs*</b>                     |                                 |                                |                                   |                                |
| Any AE                                                                     | 157 (15.9)                      | 80 (7.7)                       | 359 (19.5)                        | 175 (9.8)                      |
| Related to study drug                                                      | 96 (9.7)                        | 36 (3.5)                       | 237 (12.9)                        | 99 (5.5)                       |
| Leading to discontinuation                                                 | 19 (1.9)                        | 6 (0.6)                        | 45 (2.4)                          | 19 (1.1)                       |
| Any SAE                                                                    | 15 (1.5)                        | 2 (0.2)                        | 29 (1.6)                          | 10 (0.6)                       |
| Related to study drug                                                      | 7 (0.7)                         | 1 (<0.1)                       | 19 (1.0)                          | 4 (0.2)                        |
| Leading to hospitalization                                                 | 13 (1.3)                        | 2 (0.2)                        | 27 (1.5)                          | 6 (0.3)                        |
| <b>Central laboratory assessment of serum potassium levels<sup>†</sup></b> |                                 |                                |                                   |                                |
| >5.5 mmol/L                                                                | 213/989 (21.5)                  | 85/1,041 (8.2)                 | 400/1,835 (21.8)                  | 191/1,788 (10.7)               |
| >6.0 mmol/L                                                                | 45/989 (4.6)                    | 13/1,041 (1.2)                 | 82/1,835 (4.5)                    | 27/1,788 (1.5)                 |

\*Reported using the MedDRA-preferred terms “hyperkalemia” and “blood potassium

increased”; <sup>†</sup>Data are from the full analysis set, not the safety analysis set.

AE, adverse event; MedDRA, Medical Dictionary for Regulatory Activities; SAE, serious adverse event.

**Supplementary Table 3—Treatment-emergent adverse events affecting >5% of patients  
in any treatment group by HbA<sub>1c</sub> at baseline**

| <i>n</i> (%)                         | Baseline HbA <sub>1c</sub>        |                                |                                   |                                |
|--------------------------------------|-----------------------------------|--------------------------------|-----------------------------------|--------------------------------|
|                                      | HbA <sub>1c</sub> <7.5%           |                                | HbA <sub>1c</sub> ≥7.5%           |                                |
|                                      | Finerenone<br>( <i>n</i> = 1,382) | Placebo<br>( <i>n</i> = 1,407) | Finerenone<br>( <i>n</i> = 1,439) | Placebo<br>( <i>n</i> = 1,421) |
| Hyperkalemia                         | 224 (16.2)                        | 107 (7.6)                      | 221 (15.4)                        | 114 (8.0)                      |
| Peripheral edema                     | 82 (5.9)                          | 140 (10.0)                     | 104 (7.2)                         | 164 (11.5)                     |
| Nasopharyngitis                      | 121 (8.8)                         | 141 (10.0)                     | 120 (8.3)                         | 109 (7.7)                      |
| Hypertension                         | 102 (7.4)                         | 132 (9.4)                      | 110 (7.6)                         | 141 (9.9)                      |
| Hypoglycemia                         | 69 (5.0)                          | 77 (5.5)                       | 82 (5.7)                          | 117 (8.2)                      |
| Urinary tract infection              | 83 (6.0)                          | 78 (5.5)                       | 96 (6.7)                          | 114 (8.0)                      |
| Upper respiratory tract infection    | 95 (6.9)                          | 108 (7.7)                      | 86 (6.0)                          | 81 (5.7)                       |
| Anemia                               | 102 (7.4)                         | 105 (7.5)                      | 107 (7.4)                         | 86 (6.1)                       |
| Diarrhea                             | 86 (6.2)                          | 93 (6.6)                       | 98 (6.8)                          | 96 (6.8)                       |
| Glomerular filtration rate decreased | 84 (6.1)                          | 70 (5.0)                       | 95 (6.6)                          | 62 (4.4)                       |
| Back pain                            | 90 (6.5)                          | 87 (6.2)                       | 85 (5.9)                          | 88 (6.2)                       |
| Constipation                         | 72 (5.2)                          | 72 (5.1)                       | 59 (4.1)                          | 91 (6.4)                       |
| Pneumonia                            | 53 (3.8)                          | 90 (6.4)                       | 75 (5.2)                          | 91 (6.4)                       |
| Dizziness                            | 65 (4.7)                          | 65 (4.6)                       | 81 (5.6)                          | 88 (6.2)                       |
| Bronchitis                           | 59 (4.3)                          | 74 (5.3)                       | 75 (5.2)                          | 77 (5.4)                       |
| Arthralgia                           | 67 (4.8)                          | 75 (5.3)                       | 75 (5.2)                          | 74 (5.2)                       |
| Pain in extremity                    | 47 (3.4)                          | 30 (2.1)                       | 57 (4.0)                          | 76 (5.3)                       |
| Acute kidney injury                  | 53 (3.8)                          | 62 (4.4)                       | 76 (5.3)                          | 74 (5.2)                       |
| Cough                                | 49 (3.5)                          | 53 (3.8)                       | 61 (4.2)                          | 74 (5.2)                       |
| Hypotension                          | 72 (5.2)                          | 42 (3.0)                       | 54 (3.8)                          | 45 (3.2)                       |

**Supplementary Table 4—Treatment-emergent adverse events affecting >5% of patients  
in any treatment group by insulin use at baseline**

| <i>n</i> (%)                            | Baseline insulin use            |                                |                                   |                                |
|-----------------------------------------|---------------------------------|--------------------------------|-----------------------------------|--------------------------------|
|                                         | Without insulin                 |                                | With insulin                      |                                |
|                                         | Finerenone<br>( <i>n</i> = 989) | Placebo<br>( <i>n</i> = 1,041) | Finerenone<br>( <i>n</i> = 1,838) | Placebo<br>( <i>n</i> = 1,790) |
| Hyperkalemia                            | 133 (13.4)                      | 67 (6.4)                       | 313 (17.0)                        | 154 (8.6)                      |
| Peripheral edema                        | 47 (4.8)                        | 87 (8.4)                       | 139 (7.6)                         | 217 (12.1)                     |
| Nasopharyngitis                         | 106 (10.7)                      | 119 (11.4)                     | 135 (7.3)                         | 131 (7.3)                      |
| Hypertension                            | 67 (6.8)                        | 97 (9.3)                       | 145 (7.9)                         | 176 (9.8)                      |
| Hypoglycemia                            | 30 (3.0)                        | 29 (2.8)                       | 121 (6.6)                         | 165 (9.2)                      |
| Urinary tract infection                 | 49 (5.0)                        | 52 (5.0)                       | 130 (7.1)                         | 140 (7.8)                      |
| Anemia                                  | 74 (7.5)                        | 74 (7.1)                       | 135 (7.3)                         | 117 (6.5)                      |
| Upper respiratory tract infection       | 55 (5.6)                        | 56 (5.4)                       | 126 (6.9)                         | 133 (7.4)                      |
| Pneumonia                               | 31 (3.1)                        | 51 (4.9)                       | 97 (5.3)                          | 130 (7.3)                      |
| Diarrhea                                | 63 (6.4)                        | 68 (6.5)                       | 121 (6.6)                         | 121 (6.8)                      |
| Glomerular filtration rate<br>decreased | 54 (5.5)                        | 44 (4.2)                       | 125 (6.8)                         | 89 (5.0)                       |
| Back pain                               | 63 (6.4)                        | 54 (5.2)                       | 112 (6.1)                         | 121 (6.8)                      |
| Constipation                            | 50 (5.1)                        | 52 (5.0)                       | 81 (4.4)                          | 111 (6.2)                      |
| Dizziness                               | 40 (4.0)                        | 47 (4.5)                       | 106 (5.8)                         | 106 (5.9)                      |
| Arthralgia                              | 48 (4.9)                        | 51 (4.9)                       | 94 (5.1)                          | 98 (5.5)                       |
| Bronchitis                              | 42 (4.2)                        | 53 (5.1)                       | 92 (5.0)                          | 98 (5.5)                       |

**Supplementary Table 5—Treatment-emergent serious adverse events affecting ≥1% of patients in any treatment group by HbA<sub>1c</sub> at baseline**

| <i>n</i> (%)                            | Baseline HbA <sub>1c</sub>        |                                |                                   |                                |
|-----------------------------------------|-----------------------------------|--------------------------------|-----------------------------------|--------------------------------|
|                                         | HbA <sub>1c</sub> <7.5%           |                                | HbA <sub>1c</sub> ≥7.5%           |                                |
|                                         | Finerenone<br>( <i>n</i> = 1,382) | Placebo<br>( <i>n</i> = 1,407) | Finerenone<br>( <i>n</i> = 1,439) | Placebo<br>( <i>n</i> = 1,421) |
| Pneumonia                               | 27 (2.0)                          | 54 (3.8)                       | 43 (3.0)                          | 49 (3.4)                       |
| Acute kidney injury                     | 24 (1.7)                          | 25 (1.8)                       | 32 (2.2)                          | 26 (1.8)                       |
| Hyperkalemia                            | 21 (1.5)                          | 2 (0.1)                        | 20 (1.4)                          | 10 (0.7)                       |
| Cellulitis                              | 6 (0.4)                           | 7 (0.5)                        | 20 (1.4)                          | 15 (1.1)                       |
| Hypoglycemia                            | 10 (0.7)                          | 12 (0.9)                       | 11 (0.8)                          | 19 (1.3)                       |
| Hyperglycemia                           | 6 (0.4)                           | 5 (0.4)                        | 11 (0.8)                          | 18 (1.3)                       |
| Urinary tract infection                 | 6 (0.4)                           | 6 (0.4)                        | 15 (1.0)                          | 17 (1.2)                       |
| Diabetes mellitus<br>inadequate control | 4 (0.3)                           | 2 (0.1)                        | 8 (0.6)                           | 17 (1.2)                       |
| Syncope                                 | 6 (0.4)                           | 6 (0.4)                        | 6 (0.4)                           | 16 (1.1)                       |
| Hypertension                            | 7 (0.5)                           | 14 (1.0)                       | 8 (0.6)                           | 9 (0.6)                        |

**Supplementary Table 6—Treatment-emergent serious adverse events affecting ≥1% of patients in any treatment group by insulin use at baseline**

| <i>n</i> (%)            | Baseline insulin use            |                                |                                   |                                |
|-------------------------|---------------------------------|--------------------------------|-----------------------------------|--------------------------------|
|                         | Without insulin                 |                                | With insulin                      |                                |
|                         | Finerenone<br>( <i>n</i> = 989) | Placebo<br>( <i>n</i> = 1,041) | Finerenone<br>( <i>n</i> = 1,838) | Placebo<br>( <i>n</i> = 1,790) |
| Pneumonia               | 16 (1.6)                        | 30 (2.9)                       | 54 (2.9)                          | 73 (4.1)                       |
| Acute kidney injury     | 17 (1.7)                        | 19 (1.8)                       | 39 (2.1)                          | 32 (1.8)                       |
| Hyperkalemia            | 15 (1.5)                        | 2 (0.2)                        | 27 (1.5)                          | 10 (0.6)                       |
| Hypoglycemia            | 7 (0.7)                         | 5 (0.5)                        | 14 (0.8)                          | 26 (1.5)                       |
| Cellulitis              | 4 (0.4)                         | 7 (0.7)                        | 22 (1.2)                          | 15 (0.8)                       |
| Hyperglycemia           | 4 (0.4)                         | 4 (0.4)                        | 13 (0.7)                          | 19 (1.1)                       |
| Urinary tract infection | 3 (0.3)                         | 5 (0.5)                        | 18 (1.0)                          | 18 (1.0)                       |
| Type 2 diabetes         | 2 (0.2)                         | 4 (0.4)                        | 12 (0.7)                          | 18 (1.0)                       |

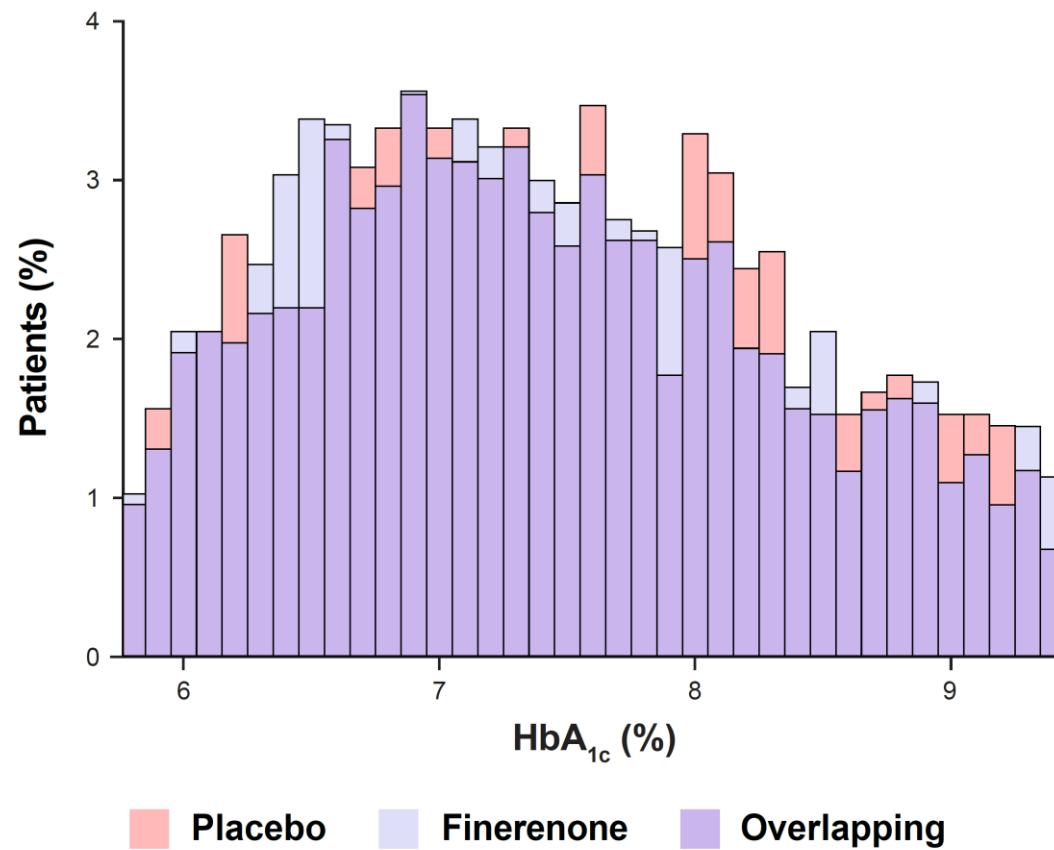

**Supplementary Figure 1**— Distribution of HbA<sub>1c</sub> at baseline in both treatment groups.



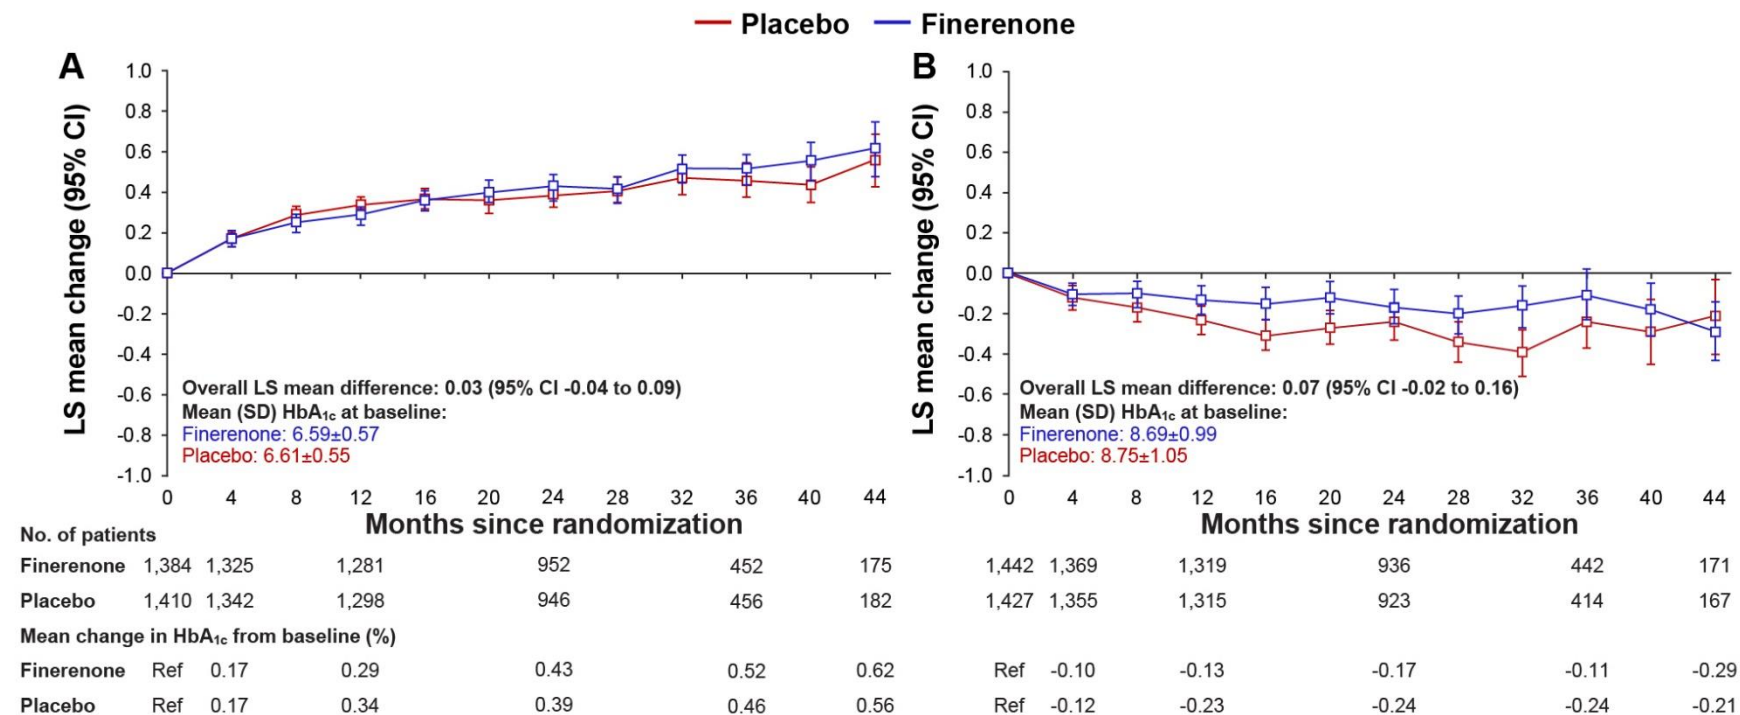

**Supplementary Figure 2**—Mixed-model analyses of HbA<sub>1c</sub> over time in patients with a baseline HbA<sub>1c</sub> <7.5% (**A**) and ≥7.5% (**B**). Analyses included the following covariates: treatment group, stratification factors (region, albuminuria category at screening, and eGFR category at screening), time, treatment over time, baseline value nested within baseline HbA<sub>1c</sub> category, and baseline value over time.

eGFR, estimated glomerular filtration rate; LS, least-squares; SD, standard deviation.

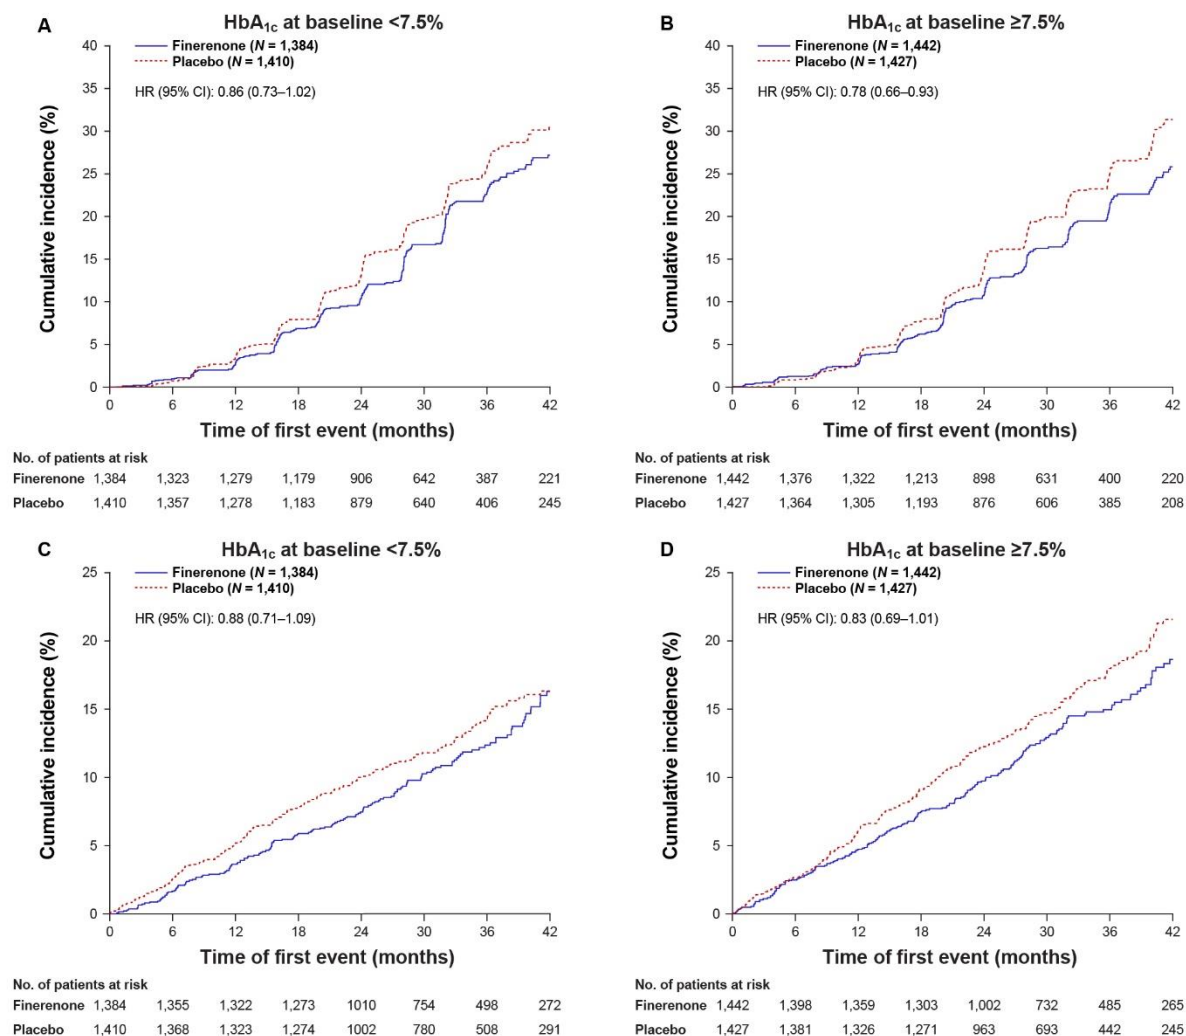

**Supplementary Figure 3**—Composite kidney and CV outcomes according to HbA<sub>1c</sub> level at baseline. Panels A and B show the primary kidney composite outcome (time-to first onset of kidney failure, sustained ≥40% decrease in eGFR from baseline, or renal death) in patients with a baseline HbA<sub>1c</sub> <7.5% (**A**) and ≥7.5% (**B**). Panels C and D show the key secondary CV composite outcome (time to first onset of CV death, nonfatal myocardial infarction, nonfatal stroke, or hospitalization for heart failure) in patients with a baseline HbA<sub>1c</sub> <7.5% (**C**) and ≥7.5% (**D**).

CV, cardiovascular; eGFR, estimated glomerular filtration rate.

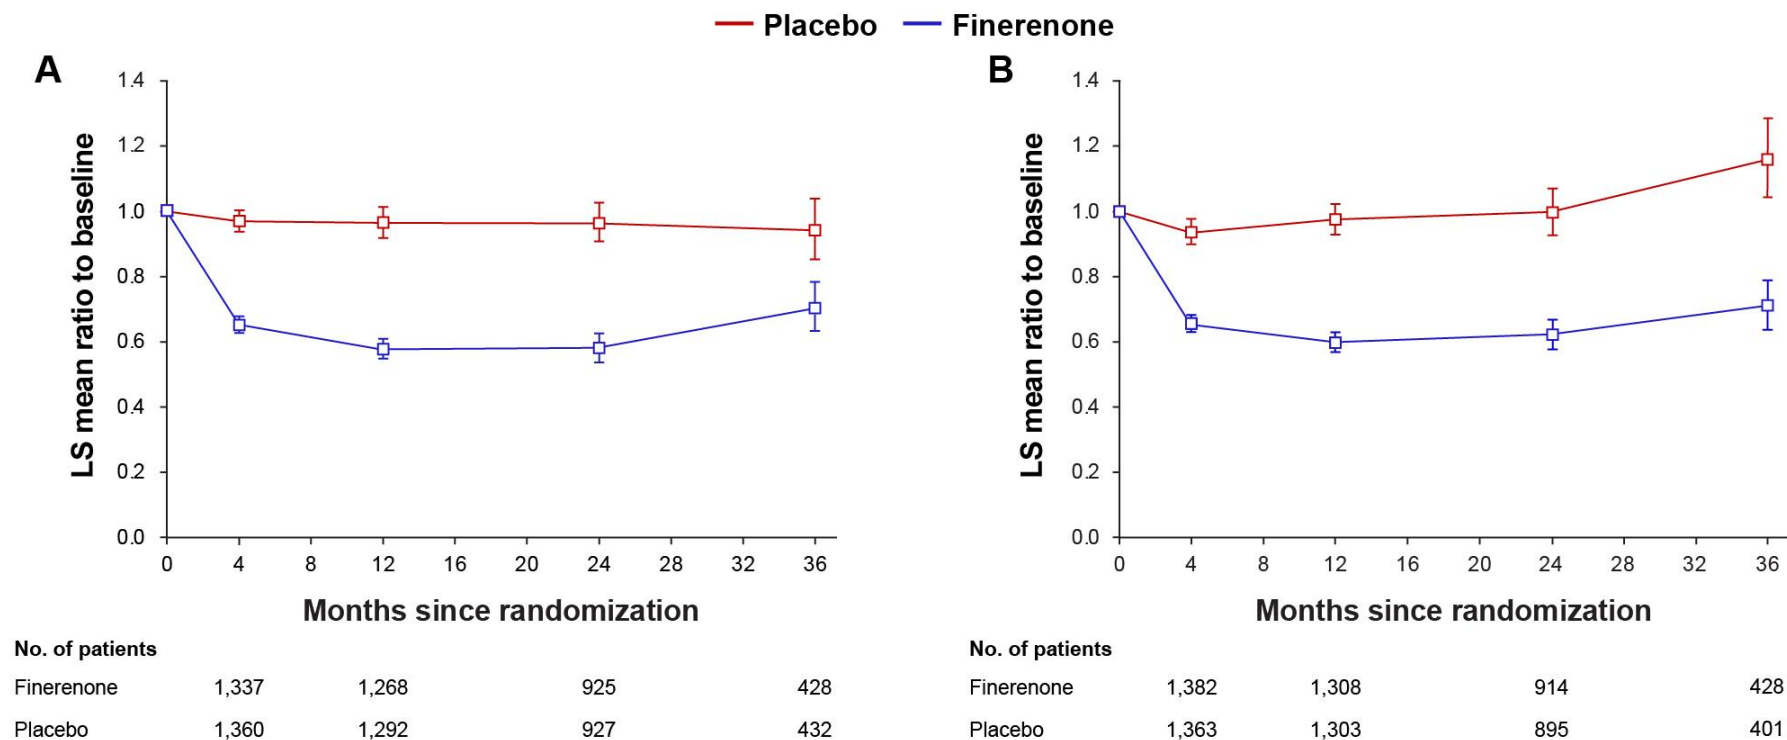

**Supplementary Figure 4**—Mixed-model analyses of UACR over time in patients with HbA<sub>1c</sub> <7.5% (**A**) or ≥7.5% (**B**) at baseline (median HbA<sub>1c</sub> at baseline). Analyses included the following covariates: treatment group, stratification factors (region, albuminuria category at screening, and eGFR category at screening), time, treatment over time, log-transformed baseline value nested within type of albuminuria at screening, and log-transformed baseline value over time.

eGFR, estimated glomerular filtration rate; LS, least squares; UACR, urine albumin-to-creatinine ratio.

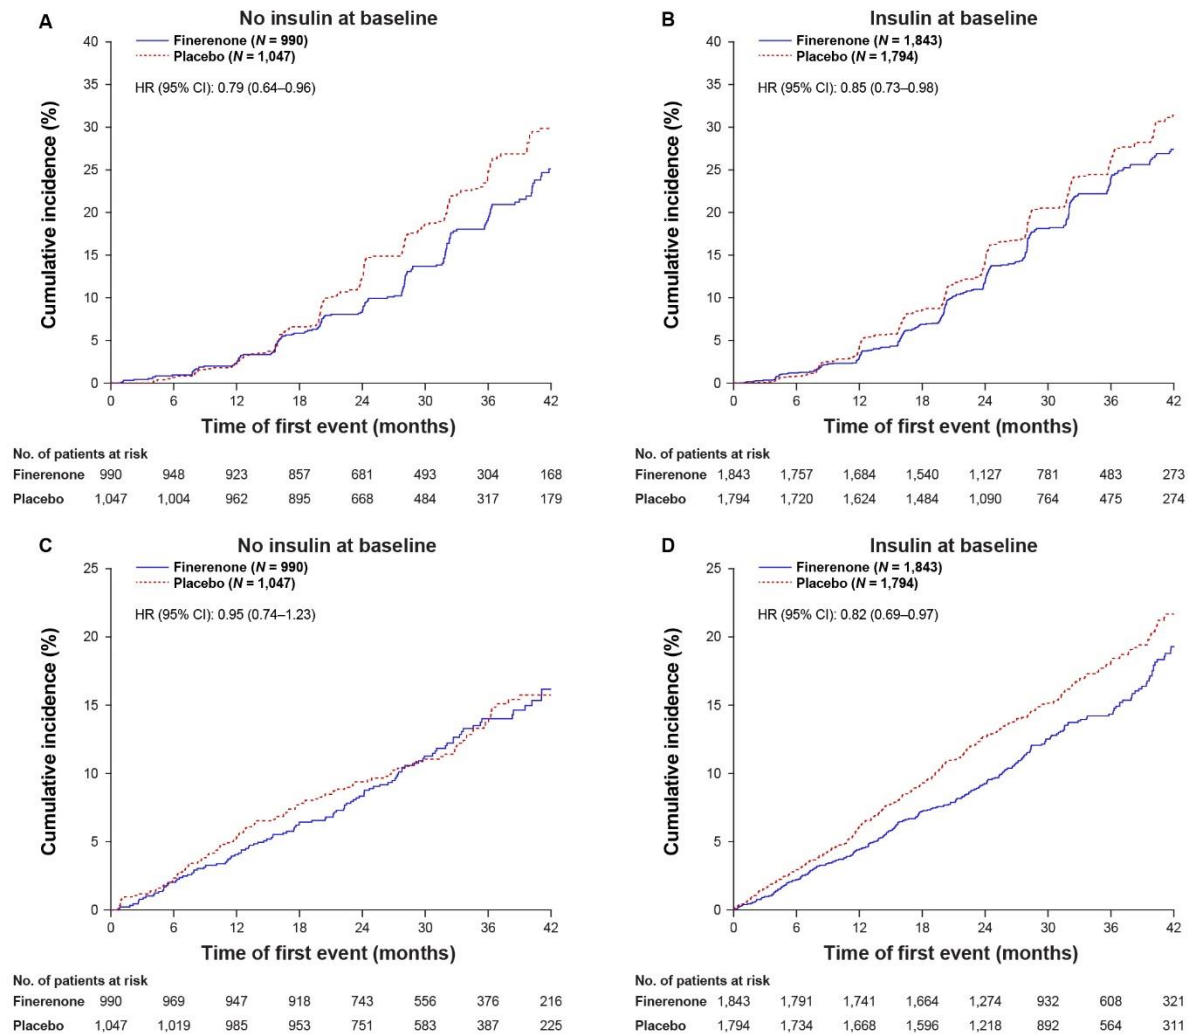

**Supplementary Figure 5**—Composite kidney and CV outcomes according to insulin use at baseline. Panels A and B show the primary kidney composite outcome (time to first onset of kidney failure, sustained  $\geq 40\%$  decrease in eGFR from baseline, or renal death) in patients not treated with insulin at baseline (**A**) and treated with insulin at baseline (**B**). Panels C and D show the key secondary CV composite outcome (time to first onset of CV death, nonfatal myocardial infarction, nonfatal stroke, or hospitalization for heart failure) in patients not treated with insulin at baseline (**C**) and treated with insulin at baseline (**D**).

CV, cardiovascular; eGFR, estimated glomerular filtration rate; HR, hazard ratio.

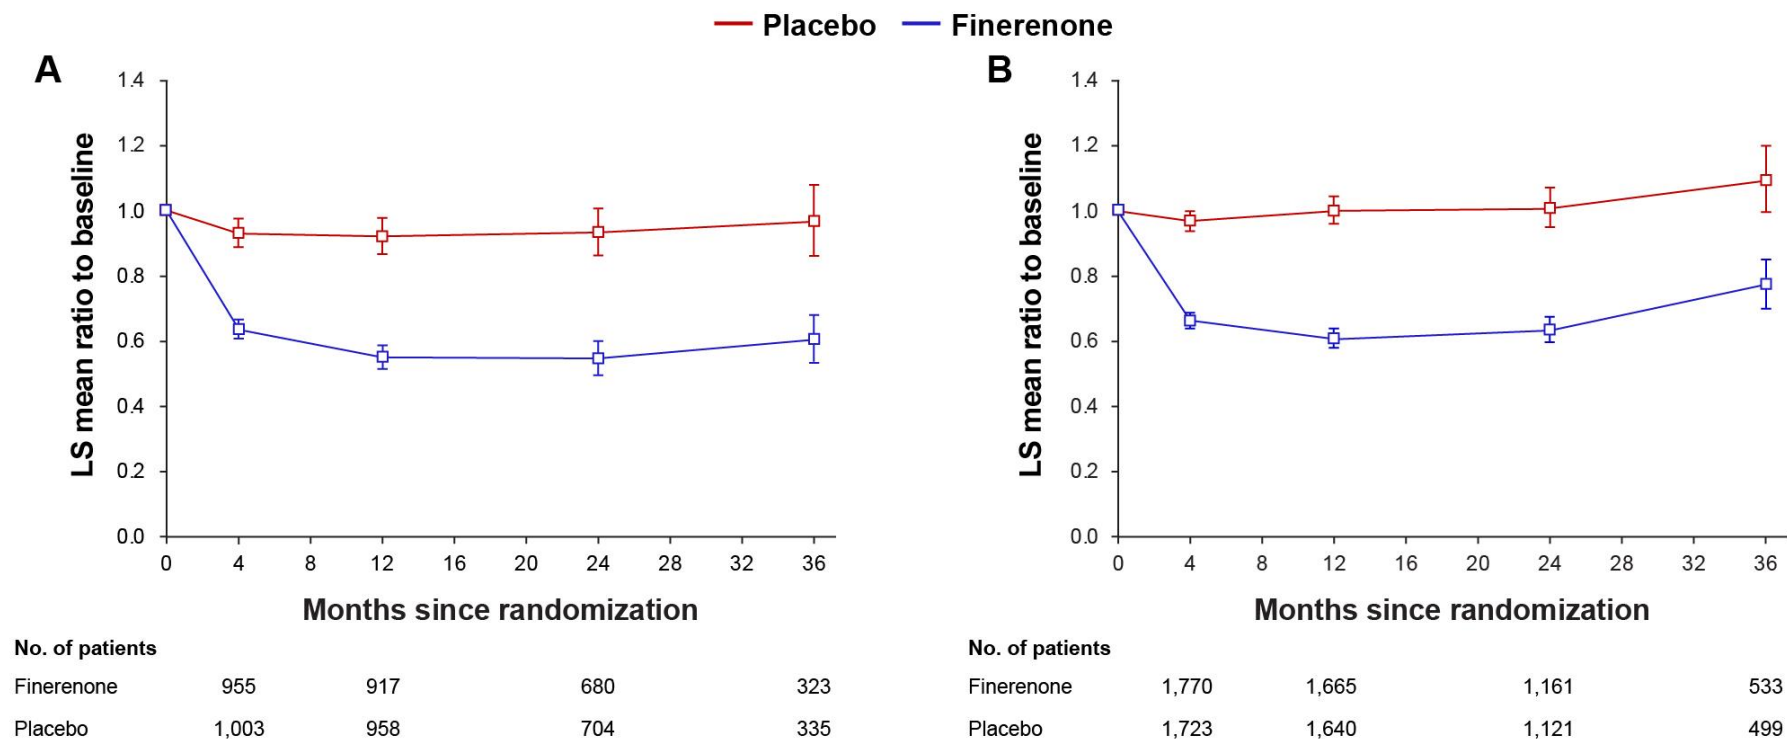

**Supplementary Figure 6**—Mixed-model analyses of UACR levels in patients without insulin use at baseline (**A**) or patients with insulin use at baseline (**B**). Analyses included the following covariates: treatment group, stratification factors (region, albuminuria category at screening, and eGFR category at screening), time, treatment over time, log-transformed baseline value nested within type of albuminuria at screening, and log-transformed baseline value over time.

eGFR, estimated glomerular filtration rate; LS, least-squares; UACR, urine albumin-to-creatinine ratio.

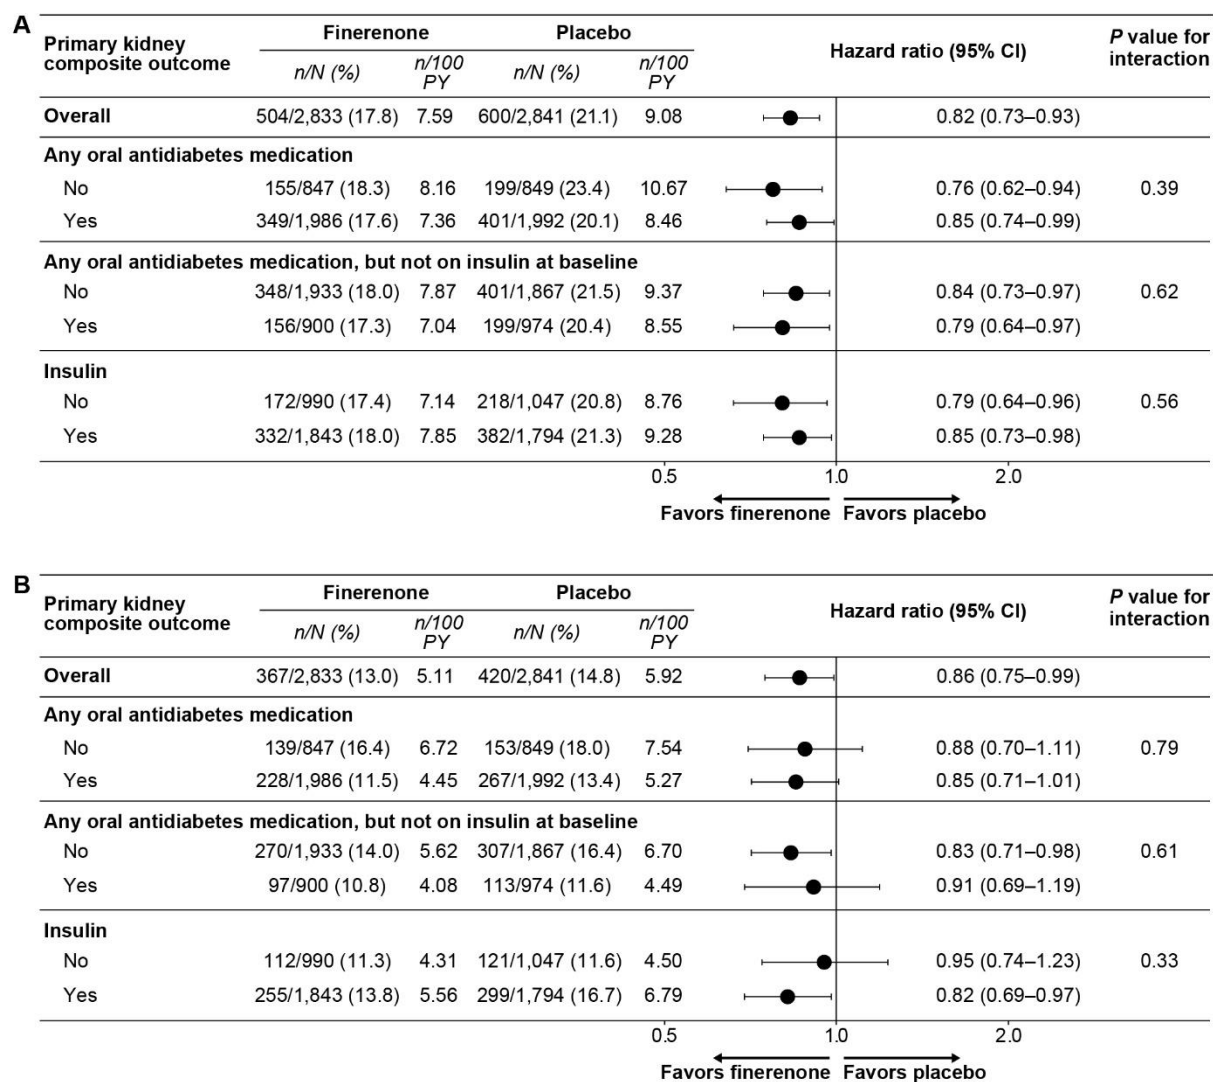

**Supplementary Figure 7**—Primary kidney composite outcome (time to first onset of kidney failure, sustained  $\geq 40\%$  decrease in eGFR from baseline, or renal death) (**A**) and key secondary CV composite outcome (time to first onset of CV death, nonfatal MI, nonfatal stroke, or hospitalization for heart failure) (**B**) according to oral antidiabetic treatment and insulin treatment at baseline. Oral antidiabetic treatments included DDP-4 inhibitors, SGLT-2 inhibitors, biguanides, sulfonylureas, alpha-glucosidase inhibitors, meglitinides, and thiazolidinediones. CV, cardiovascular; DDP-4, dipeptidyl peptidase-4; eGFR, estimated glomerular filtration rate; MI, myocardial infarction; PY, patient-years; SGLT-2, sodium–glucose cotransporter-2.

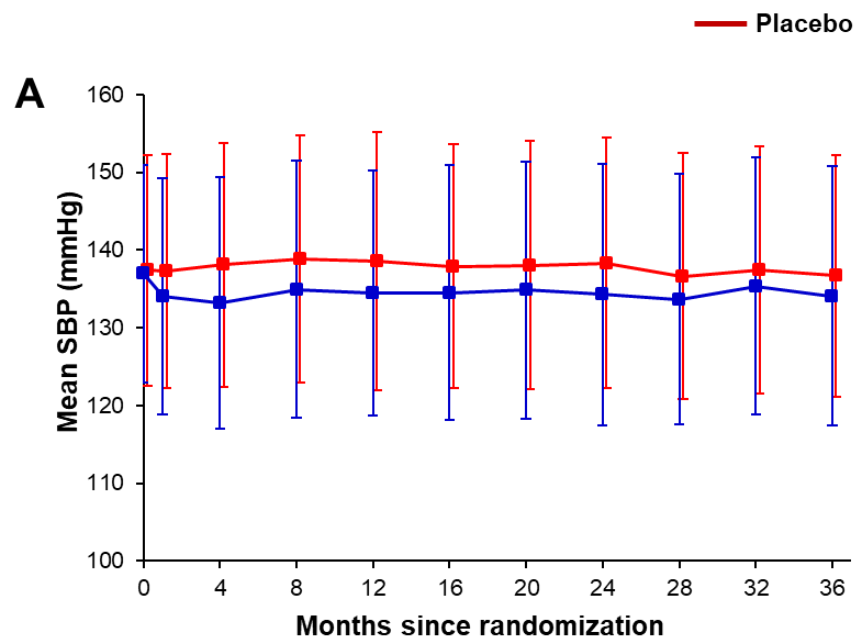

No. of patients

|            |       |     |     |     |
|------------|-------|-----|-----|-----|
| Finerenone | 961   | 928 | 707 | 343 |
| Placebo    | 1,009 | 971 | 725 | 352 |

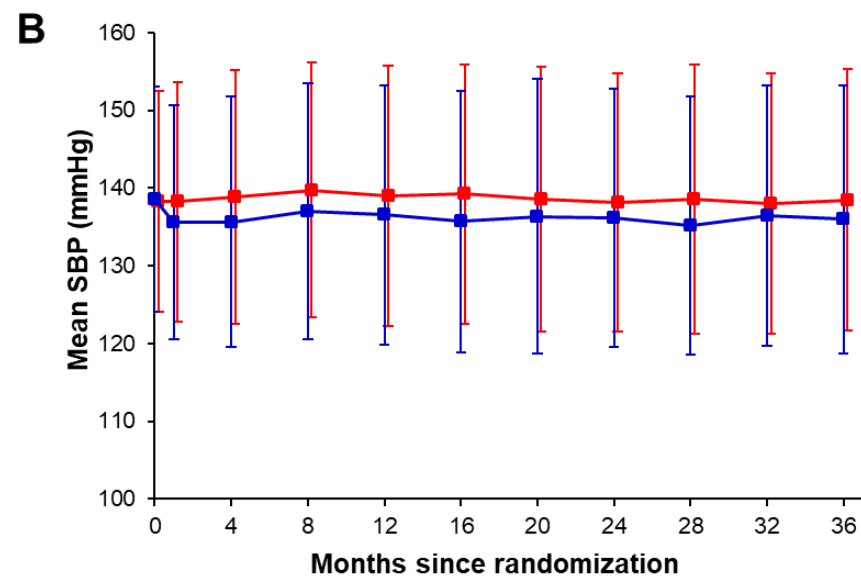

No. of patients

|            |       |       |       |     |
|------------|-------|-------|-------|-----|
| Finerenone | 1,785 | 1,700 | 1,199 | 559 |
| Placebo    | 1,742 | 1,665 | 1,170 | 532 |

**Supplementary Figure 8**—Change in systolic blood pressure over time by insulin use at baseline in patients without insulin use at baseline (**A**) or patients with use insulin at baseline (**B**).

SBP; systolic blood pressure

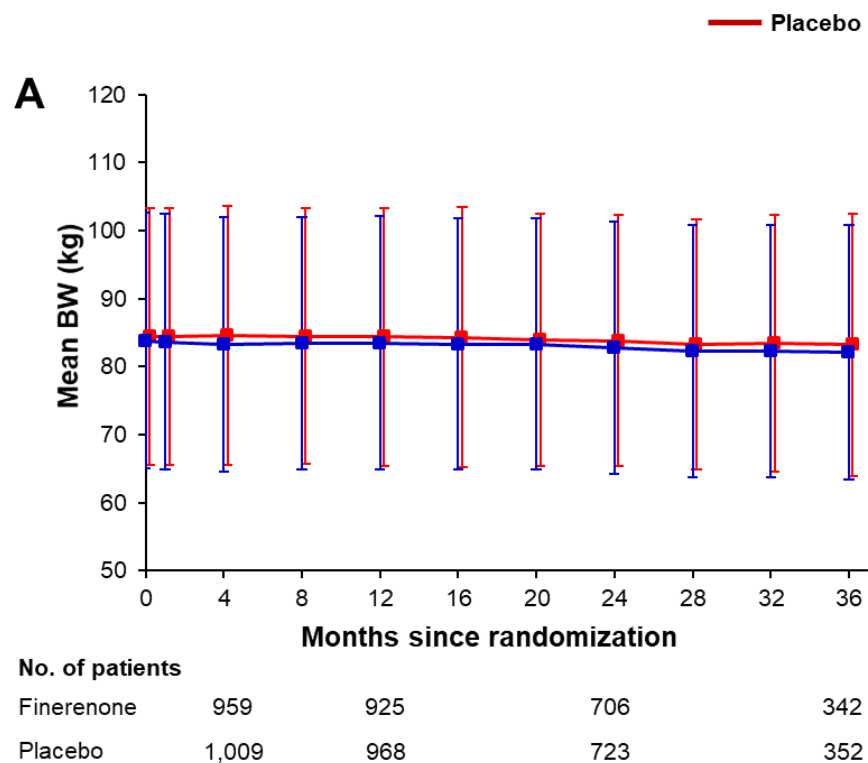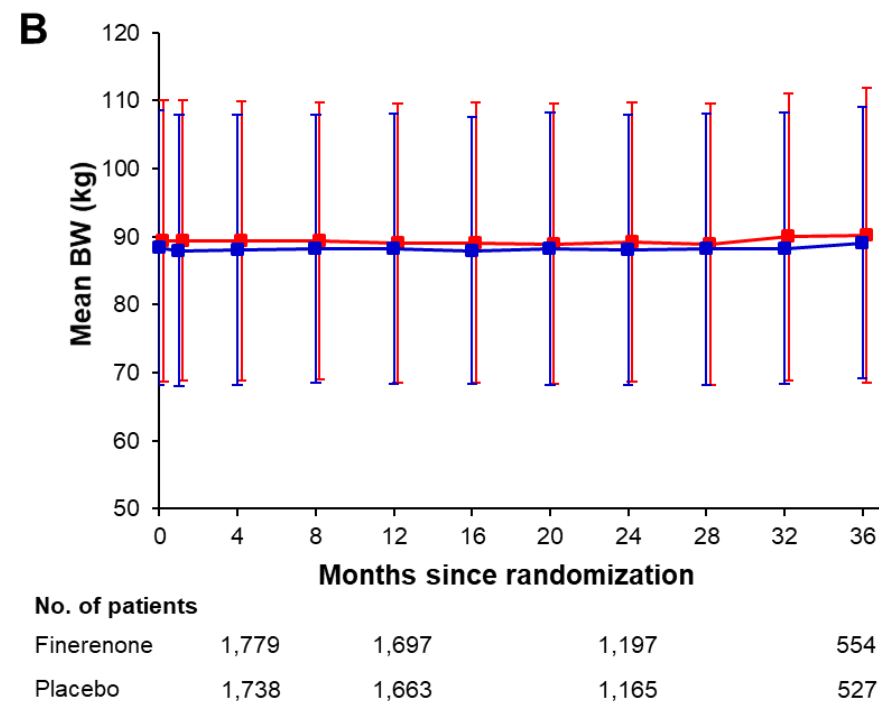

**Supplementary Figure 9**—Change in body weight over time by insulin use at baseline in patients without insulin use at baseline (**A**) or patients with insulin use at baseline (**B**).

BW, body weight
